# Supplementary material for: Identifying Animals in Camera Trap Images via Neural Architecture Search
Source: Hindawi journal article supplement (doi:10.1155/2022/8615374), 2022-02-07
Supplement: f1 [file 8615374.f1.docx]

## Supplementary Materials

Suppose there are pairs of vector and target value where , then the target value may be approximated through regression trees based on , i.e.,

where represents the *k*th tree, denotes the regression tree space, and is called tree ensemble model. XGBoost attempts to build incrementally, i.e., it adds a new tree to by minimizing the loss involving built by the previous trees as follows

where and , , are predefined hyper parameters, defines the number of leaves in , are weights of leaves in . XGBoost starts with a single tree and ends with trees. Each new tree added to is learnt based on subsamples accounting for the ratio of all samples to prevent overfitting, and it is further prevented through techniques like Shrinkage [1] and column sampling [1-2]. These overfitting-prevent techniques introduce hyper parameters , , , and . The following table shows the hyper parameter values found by Bayesian optimization.

| **Type** |  |  |  |  |  |  |  |  |  |  |  |
| --- | --- | --- | --- | --- | --- | --- | --- | --- | --- | --- | --- |
|  | 36.93 | 0.608 | 19.49 | 0.904 | 0.938 | 34.96 | 0.812 | 23 | 0.336 | 73 | 34.05 |
|  | 0.920 | 0.798 | 10.68 | 0.595 | 0.995 | 82.61 | 0.946 | 12 | 0.080 | 166 | 27.59 |

## References

[1] J. H. Friedman, “Stochastic gradient boosting”, *Computational Stat. & Data Anal.*, vol. 38, no. 4, pp. 367-378, Feb. 2002.

[2] A. Hassanin and E. J. Douzery, “Evolutionary affinities of the enigmatic saola (Pseudoryx nghetinhensis) in the context of the molecular phylogeny of Bovidae”, *Proc. Biological Sciences*, vol. 266, no. 1422, pp. 893-900, 1999.
